# Supplementary material for: Occupational exposure to chlorinated solvents and risk of head and neck cancer in men: a population-based case-control study in France
Source: PubMed Central journal article supplement (PMC5525363; doi:10.1186/s12940-017-0286-5), 2017-07-24
Supplement: 12940_2017_286_MOESM1_ESM.pdf [file 12940_2017_286_MOESM1_ESM.pdf]

Figure S1. Image plot for Spearman's correlations coefficient among chlorinated solvents and asbestos' CEI

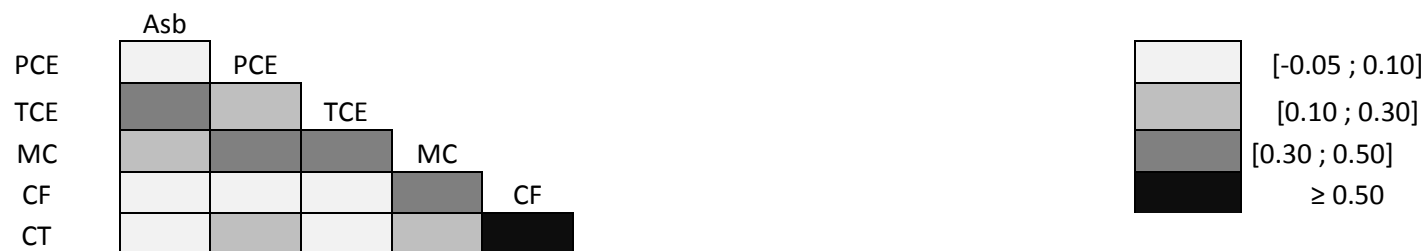

Abbreviations : Asb, asbestos; PCE, perchloroethylene; TCE, trichloroethylene; MC, methylene chloride ; CF, chloroform; TC, carbon tetrachloride

**Table S1. Associations between exposure to chlorinated solvents and head and neck cancer, without adjustment for asbestos exposure**

| Exposure                    | PCE  |      |                            | TCE  |     |                            | MC   |      |                            | CF   |      |                            | TC   |      |                            | At least one of these five chlorinated solvents |     |                            |
|-----------------------------|------|------|----------------------------|------|-----|----------------------------|------|------|----------------------------|------|------|----------------------------|------|------|----------------------------|-------------------------------------------------|-----|----------------------------|
|                             | Co   | Ca   | OR <sup>1</sup><br>[95%CI] | Co   | Ca  | OR <sup>1</sup><br>[95%CI] | Co   | Ca   | OR <sup>1</sup><br>[95%CI] | Co   | Ca   | OR <sup>1</sup><br>[95%CI] | Co   | Ca   | OR <sup>1</sup><br>[95%CI] | Co                                              | Ca  | OR <sup>1</sup><br>[95%CI] |
| Never                       | 2670 | 1747 | 1                          | 1745 | 998 | 1                          | 2518 | 1618 | 1                          | 2712 | 1808 | 1                          | 2715 | 1802 | 1                          | 1704                                            | 990 | 1                          |
| Ever                        | 94   | 76   | 1.14<br>[0.75 ; 1.73]      | 1024 | 830 | 1.20<br>[1.02 ; 1.42]      | 246  | 206  | 1.04<br>[0.80 ; 1.35]      | 52   | 15   | 0.58<br>[0.27 ; 1.23]      | 49   | 21   | 0.61<br>[0.30 ; 1.21]      | 1065                                            | 838 | 1.18<br>[1.02 ; 1.38]      |
| <b>Duration<sup>2</sup></b> |      |      |                            |      |     |                            |      |      |                            |      |      |                            |      |      |                            |                                                 |     |                            |
| Short                       | 44   | 33   | 1.12<br>[0.63 ; 2.16]      | 301  | 227 | 1.10<br>[0.85 ; 1.42]      | 99   | 90   | 1.12<br>[0.76 ; 1.65]      | 22   | 7    | 0.77<br>[0.27 ; 2.20]      | 26   | 10   | 0.59<br>[0.23 ; 1.50]      | 303                                             | 225 | 1.10<br>[0.85 ; 1.42]      |
| Intermediate                | 26   | 25   | 1.40<br>[0.65 ; 3.01]      | 401  | 312 | 1.26<br>[1.01 ; 1.58]      | 67   | 50   | 0.85<br>[0.51 ; 1.40]      | 13   | 3    | 0.21<br>[0.03 ; 1.38]      | 10   | 4    | 0.35<br>[0.06 ; 1.99]      | 420                                             | 315 | 1.21<br>[0.97 ; 1.51]      |
| Long                        | 24   | 18   | 0.87<br>[0.38 ; 1.96]      | 322  | 290 | 1.24<br>[0.98 ; 1.57]      | 80   | 66   | 1.11<br>[0.71 ; 1.73]      | 17   | 5    | 0.63<br>[0.16 ; 2.38]      | 13   | 7    | 0.85<br>[0.25 ; 2.91]      | 342                                             | 297 | 1.24<br>[0.95 ; 1.53]      |
| p for trend                 |      |      | 0.93                       |      |     | 0.05                       |      |      | 0.77                       |      |      | 0.19                       |      |      | 0.38                       |                                                 |     | 0.08                       |
| <b>CEI</b>                  |      |      |                            |      |     |                            |      |      |                            |      |      |                            |      |      |                            |                                                 |     |                            |
| Low                         | 47   | 39   | 1.29<br>[0.72 ; 2.30]      | 515  | 414 | 1.22<br>[1.00 ; 1.49]      | 121  | 109  | 1.18<br>[0.82 ; 1.69]      | 26   | 5    | 0.51<br>[0.15 ; 1.71]      | 25   | 7    | 0.45<br>[0.16 ; 1.33]      | 536                                             | 419 | 1.22<br>[0.99 ; 1.49]      |
| Medium                      | 36   | 21   | 0.71<br>[0.34 ; 1.51]      | 409  | 339 | 1.25<br>[1.00 ; 1.56]      | 101  | 68   | 0.72 [0.47 ; 1.10]         | 26   | 10   | 0.62<br>[0.23 ; 1.66]      | 24   | 14   | 0.75<br>[0.30 ; 1.85]      | 423                                             | 318 | 1.12<br>[0.90 ; 1.40]      |
| High                        | 11   | 16   | 1.79<br>[0.68 ; 4.72]      | 100  | 76  | 1.01<br>[0.68 ; 1.50]      | 24   | 29   | 1.75<br>[0.87 ; 3.55]      |      |      |                            |      |      |                            | 106                                             | 100 | 1.19<br>[0.82 ; 1.73]      |
| p for trend                 |      |      | 0.42                       |      |     | 0.50                       |      |      | 0.47                       |      |      | 0.14                       |      |      | 0.41                       |                                                 |     | 0.30                       |

Abbreviations: PCE=perchloroethylene; TCE=trichloroethylene; MC=methylene chloride; CF=chloroform; CT=carbon tetrachloride; OR= odds ratio; CI= confidence interval; CEI= cumulative exposure index; Ca= cases; Co= controls

1-OR adjusted for age at interview, residence area, alcohol consumption, smoking status, frequency and duration of smoking

2- Categories of duration of exposure to solvents were defined as follows: for PCE: short : < 5, intermediate: 5-15, long : > 15; for TCE and 'at least to one chlorinated solvent': short: <5, intermediate : 5-20, long : > 20; for MC and CT short : < 5, intermediate : 5 to 15, long : > 15; for CF short : < 10, intermediate : 10 to 20, long : > 20

**Table S2. Association between head and neck cancer and exposure to chlorinated solvents, with adjustment for educational level**

| Exposure                    | PCE  |      |                            | TCE  |     |                            | MC   |      |                            | CF   |      |                            | CT   |      |                            | At least one chlorinated solvent |     |                        |
|-----------------------------|------|------|----------------------------|------|-----|----------------------------|------|------|----------------------------|------|------|----------------------------|------|------|----------------------------|----------------------------------|-----|------------------------|
|                             | Co   | Ca   | OR <sup>1</sup><br>[95%CI] | Co   | Ca  | OR <sup>1</sup><br>[95%CI] | Co   | Ca   | OR <sup>1</sup><br>[CI95%] | Co   | Ca   | OR <sup>1</sup><br>[CI95%] | Co   | Ca   | OR <sup>1</sup><br>[CI95%] | Co                               | Ca  | OR<br>[95%CI]          |
| Never                       | 2498 | 1445 | 1                          | 1646 | 808 | 1                          | 2354 | 1323 | 1                          | 2534 | 1494 | 1                          | 2537 | 1490 | 1                          | 1605                             | 801 | 1                      |
| Ever                        | 86   | 63   | 0.93<br>[0.60 to 1.44]     | 943  | 703 | 0.97<br>[0.80 to 1.19]     | 230  | 185  | 0.92<br>[0.70 to 1.21]     | 50   | 14   | 0.83<br>[0.38 to 1.83]     | 47   | 18   | 0.71<br>[0.35 to 1.47]     | 984                              | 710 | 0.96<br>[0.79 to 1.17] |
| <b>Duration<sup>2</sup></b> |      |      |                            |      |     |                            |      |      |                            |      |      |                            |      |      |                            |                                  |     |                        |
| Short                       | 40   | 29   | 1.03<br>[0.54 to 1.94]     | 275  | 194 | 0.86<br>[0.66 to 1.14]     | 89   | 83   | 1.05<br>[0.70 to 1.56]     | 20   | 2    | 0.94<br>[0.31 to 2.82]     | 24   | 10   | 0.71<br>[0.27 to 1.90]     | 277                              | 193 | 0.95<br>[0.71 to 1.26] |
| Intermediate                | 23   | 18   | 0.94<br>[0.41 to 2.16]     | 373  | 271 | 0.97<br>[0.76 to 1.24]     | 63   | 40   | 0.65<br>[0.38 to 1.11]     | 13   | 1    | 0.22<br>[0.03 to 1.63]     | 10   | 3    | 0.52<br>[0.10 to 2.83]     | 392                              | 274 | 0.98<br>[0.76 to 1.27] |
| Long                        | 23   | 16   | 0.78<br>[0.35 to 1.76]     | 295  | 238 | 0.95<br>[0.73 to 1.23]     | 78   | 62   | 0.99<br>[0.62 to 1.57]     | 17   | 2    | 0.91<br>[0.24 to 3.49]     | 13   | 5    | 0.88<br>[0.23 to 3.29]     | 315                              | 243 | 0.93<br>[0.71 to 1.22] |
| <b>CEI</b>                  |      |      |                            |      |     |                            |      |      |                            |      |      |                            |      |      |                            |                                  |     |                        |
| Low                         | 43   | 32   | 1.06<br>[0.58 to 1.95]     | 473  | 357 | 1.01<br>[0.80 to 1.28]     | 109  | 97   | 1.05<br>[0.71 to 1.54]     | 25   | 3    | 0.93<br>[0.28 to 3.08]     | 23   | 7    | 0.53<br>[0.17 to 1.62]     | 495                              | 363 | 1.02<br>[0.81 to 1.29] |
| Medium                      | 32   | 19   | 0.58<br>[0.27 to 1.24]     | 378  | 285 | 0.98<br>[0.79 to 1.26]     | 97   | 61   | 0.64<br>[0.41 to 0.99]     | 25   | 2    | 0.77<br>[0.27 to 2.15]     | 24   | 11   | 0.89<br>[0.35 to 2.26]     | 388                              | 263 | 0.89<br>[0.69 to 1.15] |
| High                        | 11   | 12   | 1.49<br>[0.54 to 4.11]     | 92   | 61  | 0.79<br>[0.52 to 1.21]     | 24   | 27   | 1.5<br>[0.73 to 3.06]      |      |      |                            |      |      |                            | 101                              | 84  | 0.93<br>[0.63 to 1.38] |

Abbreviations: PCE=perchloroethylene; TCE=trichloroethylene; MC=methylene chloride; CF=chloroform; CT=carbon tetrachloride; OR= odds ratio; CI= confidence interval; CEI= cumulative exposure index; Ca= cases; Co= controls

1-OR adjusted for age at interview, residence area, alcohol consumption, smoking status, frequency and duration of smoking, exposure to asbestos and level of education

2- Categories of duration of exposure to solvents were defined as follows: for PCE: short : < 5, intermediate: 5-15, long : > 15; for TCE and 'at least to one chlorinated solvent': short: <5, intermediate : 5-20, long : > 20; for MC and CT short : < 5, intermediate : 5 to 15, long : > 15; for CF short : < 10, intermediate : 10 to 20, long : > 20

**Table S3. Association between head and neck cancer and exposure to chlorinated solvents, with adjustment for occupational class**

| Exposure                    | PCE  |      |                            | TCE  |     |                            | MC   |      |                            | CF   |      |                            | CT   |      |                            | At least one chlorinated solvent |     |                            |
|-----------------------------|------|------|----------------------------|------|-----|----------------------------|------|------|----------------------------|------|------|----------------------------|------|------|----------------------------|----------------------------------|-----|----------------------------|
|                             | Co   | Ca   | OR <sup>1</sup><br>[95%CI] | Co   | Ca  | OR <sup>1</sup><br>[95%CI] | Co   | Ca   | OR <sup>1</sup><br>[95%CI] | Co   | Ca   | OR <sup>1</sup><br>[95%CI] | Co   | Ca   | OR <sup>1</sup><br>[95%CI] | Co                               | Ca  | OR <sup>1</sup><br>[95%CI] |
| Never                       | 2581 | 1635 | 1                          | 1686 | 938 | 1                          | 2432 | 1508 | 1                          | 2619 | 1691 | 1                          | 2622 | 1686 | 1                          | 1645                             | 930 |                            |
| Ever                        | 89   | 70   | 0.95<br>[0.62 to 1.45]     | 989  | 770 | 0.84<br>[0.69 to 1.02]     | 238  | 197  | 0.87<br>[0.66 to 1.13]     | 51   | 14   | 0.73<br>[0.33 to 1.63]     | 48   | 19   | 0.69<br>[0.34 to 1.41]     | 1030                             | 778 | 0.84<br>[0.69 to 1.01]     |
| <b>Duration<sup>2</sup></b> |      |      |                            |      |     |                            |      |      |                            |      |      |                            |      |      |                            |                                  |     |                            |
| Short                       | 41   | 31   | 1<br>[0.53 to 1.86]        | 289  | 215 | 0.84<br>[0.63 to 1.11]     | 93   | 88   | 0.92<br>[0.62 to 1.36]     | 21   | 7    | 0.94<br>[0.31 to 2.82]     | 25   | 10   | 0.63<br>[0.24 to 1.67]     | 291                              | 213 | 0.86<br>[0.65 to 1.13]     |
| Intermediate                | 25   | 23   | 1.13<br>[0.53 to 2.44]     | 390  | 290 | 0.89<br>[0.70 to 1.15]     | 66   | 46   | 0.71<br>[0.43 to 1.19]     | 13   | 2    | 0.22<br>[0.03 to 1.63]     | 10   | 3    | 0.43<br>[0.07 to 2.50]     | 409                              | 295 | 0.87<br>[0.68 to 1.12]     |
| Long                        | 23   | 16   | 0.79<br>[0.32 to 1.61]     | 310  | 265 | 0.78<br>[0.60 to 1.02]     | 79   | 63   | 0.92<br>[0.59 to 1.44]     | 17   | 5    | 0.91<br>[0.24 to 3.49]     | 13   | 6    | 1.05<br>[0.30 to 3.63]     | 330                              | 270 | 0.78<br>[0.60 to 1.01]     |
| <b>CEI</b>                  |      |      |                            |      |     |                            |      |      |                            |      |      |                            |      |      |                            |                                  |     |                            |
| Low                         | 44   | 36   | 1.1<br>[0.61 to 1.99]      | 497  | 391 | 0.90<br>[0.71 to 1.13]     | 114  | 107  | 1<br>[0.69 to 1.45]        | 25   | 5    | 0.8<br>[0.23 to 2.78]      | 24   | 7    | 0.51<br>[0.16 to 1.55]     | 518                              | 397 | 0.93<br>[0.74 to 1.17]     |
| Medium                      | 34   | 20   | 0.58<br>[0.27 to 1.24]     | 397  | 313 | 0.83<br>[0.64 to 1.06]     | 100  | 63   | 0.62<br>[0.40 to 0.95]     | 26   | 9    | 0.69<br>[0.25 to 1.94]     | 24   | 12   | 0.87<br>[0.34 to 2.18]     | 408                              | 291 | 0.75<br>[0.58 to 0.96]     |
| High                        | 11   | 14   | 1.39<br>[0.53 to 3.65]     | 95   | 66  | 0.64<br>[0.42 to 1.09]     | 24   | 27   | 1.27<br>[0.62 to 2.58]     |      |      |                            |      |      |                            | 104                              | 90  | 0.76<br>[0.51 to 1.11]     |

Abbreviations: PCE=perchloroethylene; TCE=trichloroethylene; MC=methylene chloride; CF=chloroform; CT=carbon tetrachloride; OR= odds ratio; CI= confidence interval; CEI= cumulative exposure index; Ca= cases; Co= controls.

1-OR adjusted for age at interview, residence area, alcohol consumption, smoking status, frequency and duration of smoking, exposure to asbestos and category of the longest job held

2- Categories of duration of exposure to solvents were defined as follows: for PCE: short : < 5, intermediate: 5-15, long : > 15; for TCE and 'at least to one chlorinated solvent': short: <5, intermediate : 5-20, long : > 20; for MC and CT short : < 5, intermediate : 5 to 15, long : > 15; for CF short : < 10, intermediate : 10 to 20, long : > 20.
